# Supplementary material for: Intranasal acellular pertussis vaccine provides mucosal immunity and protects mice from Bordetella pertussis
Source: PubMed Central journal article supplement (PMC6776550; doi:10.1038/s41541-019-0136-2), 2019-10-03
Supplement: 41541_2019_136_MOESM1_ESM.pdf [file 41541_2019_136_MOESM1_ESM.pdf]

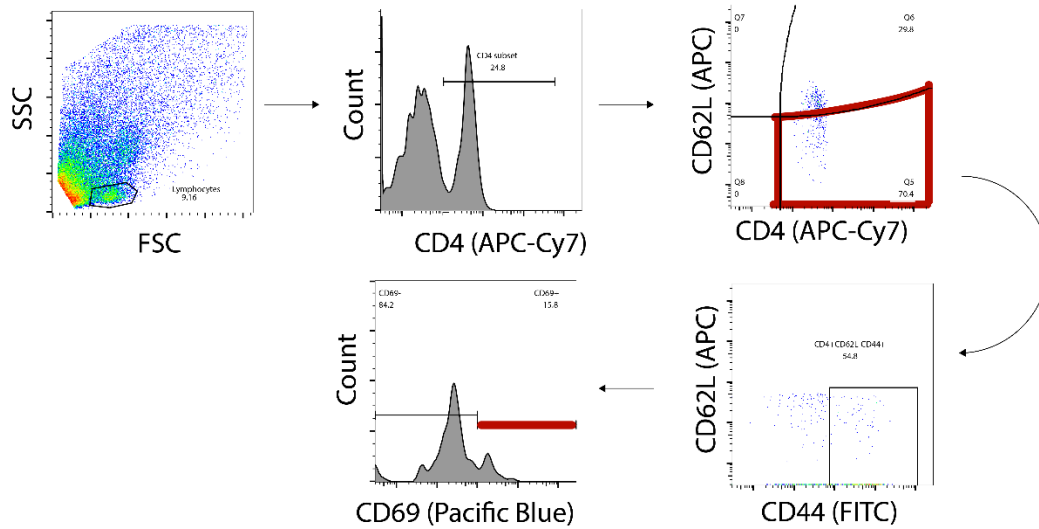

**Supplementary Figure 1. Gating strategy used to isolate CD4<sup>+</sup>CD62L<sup>-</sup>CD44<sup>+</sup>CD69<sup>+</sup> T cells.** Live, single lymphocytes were gated based on size and granularity using FSC and SSC. T cells were determined by CD4 expression. CD62L<sup>-</sup>CD4<sup>+</sup> cells, were gated on the T cell activation marker CD44. Finally, CD62L<sup>-</sup>CD4<sup>+</sup> CD44<sup>+</sup> cells were gated on expression of the tissue homing marker CD69. These data are represented in Fig. 4c.
